# Supplementary material for: Establishment of a fluorescent reporter of RNA-polymerase II activity to identify dormant cells
Source: PubMed Central journal article supplement (PMC8175728; doi:10.1038/s41467-021-23580-4), 2021-06-03
Supplement: 41467_2021_23580_MOESM4_ESM.pdf [file 41467_2021_23580_MOESM4_ESM.pdf]

Title: Supplementary Movie 1.

Description: Timelapse imaging of mouse small intestinal organoids infected with OSCAR lentivirus. Movie stills are shown in Fig. 2.

Title: Supplementary Data 1.

Description: Raw data of DAPI, mCherry, Ven90 and RNAPII-pSer2 (Pol2S2) immunofluorescence signal quantification by using ImageJ. The table also contains OSCAR signal (VeN90/mCherry), RNAPII-pSer2 signal normalized on DAPI (Pol2/DAPI) and OSCAR signal normalized on RNAPII-pSer2 (OSCAR/Pol2). The quantification comes from 184 (analysis shown in Figure 3), 117, 197, 101 cells coming from 4 independent experiments from 2 different mice. Replicates number 2,3,4 gave the same results as those shown in Figure 3.

Title: Supplementary Data 2.

Description: List of reagents and resources used in this study.
